# Supplementary material for: Thiabendazole: a new class of antenna core structure for multifunctional trivalent organo-europium (EuIII) complexes
Source: Royal Society of Chemistry journal article supplement (doi:10.1039/d2tc01078j), 2022-01-01
Supplement: d2tc01078j1.pdf [file d2tc01078j1.pdf]

## Supporting Information

### **Thiabendazole: A new class of antenna core structure for Multifunctional Trivalent Organo-Europium (Eu<sup>III</sup>) Complexes†**

Sibani Mund,<sup>a</sup> Kasturi Singh<sup>a</sup>, Munmun Panda,<sup>b</sup> Bijesh Biswal,<sup>b</sup> Usharani Subuddhi<sup>a</sup> and

Sivakumar Vaidyanathan<sup>a\*</sup>

<sup>a</sup>Department of Chemistry, National Institute of Technology, Rourkela – 769008, Odisha, India

<sup>b</sup>Department of Life Sciences, National Institute of Technology, Rourkela – 769008, Odisha,  
India

†Dedicated to Dr. V. Subramanian on the occasion of his 60<sup>th</sup> birthday.

**General aspects of synthesis:**

All reactions were carried out under an inert (nitrogen N<sub>2</sub>) environment. Prior to the reaction, the usable Solvents tetrahydrofuran (THF), Dimethylformamide (DMF), Toluene, etc. were properly dried and carefully distilled by using appropriate drying agents (P<sub>2</sub>O<sub>5</sub>, sodium metal, Benzophenone. Commercially available chemicals TBZ, TTA, DBM, Carbazole, 1, 4 dibromo butane, Benzyl bromide, Europium (III) chloride hex hydrate (99.99%), were used for synthesis processes. CdCl<sub>2</sub>, DMSO-d<sub>6</sub>, poly (methyl methacrylate) (PMMA) and tetrabutylammonium perchlorate (nBu<sub>4</sub>NClO<sub>4</sub>) electrolyte were used for characterization process.

**Characterization technique:**

All the synthesized ligand and their corresponding Eu(III) complexes were synthesized and are characterized by different characterization techniques. <sup>1</sup>H and <sup>13</sup>C NMR spectra were recorded for the structural conformation of ligands as well as complexes in DMSO-d<sub>6</sub> and CDCl<sub>3</sub> solvents. All spectra were recorded with the help of the AV 400 Advance-III 400 MHz Fourier transform nuclear magnetic resonance (FT-NMR) spectrometer (Bruker Biospin International, Switzerland). To know electronic bond formation, the Fourier transforms infrared (FTIR) spectra (in 400-4000 cm<sup>-1</sup> range) were recorded by using KBr disc with the help of PerkinElmer, USA/RX-I FTIR, spectrophotometer. Mass spectra of all the synthesized fluorophores were recorded on High Resolution Mass Spectrometer (HRMS) Waters, USA, XEVO G2-XS QTOF model. The thermal stability of the samples was investigated by TGA analytical technique (Nietzsche STA 449C, Germany) under N<sub>2</sub> atmosphere at 30° to 800°C temperature range of heating rate 10°C under ambient conditions. The UV-Vis absorption spectra using different solvents were performed. UV-Vis spectrophotometer (UV-2450 PerkinElmer). The photoluminescence (PL) excitation and emission spectra in solid, solution and thin film were

measured by Edinburg Spectrofluorometer FS-5 instruments associated with SC – 10 modules and SC-5 modules. The photoluminescence quantum yield were recorded with the with Edinburgh Instruments, Spectrofluorometer, FS5, Integrating Sphere SC-30. The CIE color coordinate for all emission spectra is calculated by MATLAB software. The electrochemical analysis was performed by using cyclic voltammeter (CV), AUTO LAB 302N Modular potentiostat. Basically, a calomel electrode was used as the reference electrode where as a platinum electrode was used as the working electrodes well as counter electrode. Measurement was performed in DMF solvents and tetrabutylammonium per chlorate was used as the supporting electrolyte, at a scanning speed of 50 mV/S. The computational study about ligand structure (ground state geometry) was optimized by density functional theory (DFT the B3LYP/6-31G (d, p) level of basis set in the G09W suite of programs.

#### **General synthesis of ligands:**

##### **Synthesis of 4-(1-benzyl-1H-benzo[d]imidazol-2-yl) Thiazole (TBZ-CH<sub>2</sub>-Ph**

To begin the synthesis first, the DMF was dried and distilled properly. In a dried two necked Round bottom flask, 9.37 mmol of Thiabendazole (TBZ) and 22.8 mmol of K<sub>2</sub>CO<sub>3</sub> were taken and dissolved in 30 mL of dry DMF. The reaction temperature was set to 600C and stirred for 30 minutes. To the above solution, 2.1 mmol of Benzyl bromide was added dropwise at the same temperature and left it for 12 hours. The progression of the reaction was monitored by TLC. After the completion of the reaction, the reaction mixture was poured in ice-cold water. The organic compound was extracted in Ethyl acetate in a separating funnel. The purification was carried out by column chromatography packed with 200-300 mg silica gel by using Petroleum ether and Ethyl acetate as eluent. The white colour pure solid product was obtained. **<sup>1</sup>H-NMR Data (400 MHz, CDCl<sub>3</sub>, δppm):** δ 8.90 (s, 1H), 7.84 (d, *J* = 8.1 Hz, 1H), 7.43 – 7.09 (m, 9H),

6.11 (s, 2H). <sup>13</sup>CNMR (400 MHz, CDCl<sub>3</sub>, δppm) δ 155.23 (s), 152.46 (s) 137.62 (s) 49.9 Hz(s), 131.60 (s), 129.16 (s), 127.22 – 113.89 (s), 97.74 (s), 79.41 – 70.45(s). HRMS: Mass Calculated m/z = 291.08 found m/z ratio = 291.12

**Synthesis of 9-(4-bromobutyl)-9H-carbazole (Intermediate compound):**

The synthesis was carried out first by dissolving 15 mmol of Carbazole in a minimum amount of THF. To the solution 60 mmol of 1, 4 dibromobutane was added dropwise. Another solution was prepared by taking 75 mmol of KOH and 1.5 mmol of TBAB in 100 mL water. Both the solution was mixed together and taken in a round bottom flask and allowed the reaction mixture to reflux for 18 hours. The progress of the reaction was monitored by TLC. After completion, the reaction mixture was poured in ice-cold water and DCM. The organic layer was then separated. The purification was done by column chromatography and the white color product was collected and dried over vacuumed. <sup>1</sup>H-NMR Data (400 MHz, CDCl<sub>3</sub>): <sup>1</sup>H NMR (400 MHz, CDCl<sub>3</sub>) δ 8.14 (d, *J* = 7.8 Hz, 2H), 8.14 (d, *J* = 7.8 Hz, 2H), 7.50 (t, *J* = 7.6 Hz, 2H), 7.43 (d, *J* = 8.1 Hz, 2H), 7.28 (dd, *J* = 9.9, 4.8 Hz, 2H), 4.39 (t, *J* = 6.9 Hz, 2H), 3.41 (t, *J* = 6.5 Hz, 2H), 2.14 – 2.04 (m, 2H), 1.94 3(dt, *J* = 13.1, 6.5 Hz, 2H). <sup>13</sup>C NMR (400 MHz, CDCl<sub>3</sub>, δ ppm) δ 140.30 (s), 125.73 (s), 123.52 – 122.95 (s), 120.44 (s), 118.96 (s), 108.54 (s), 80.75 – 71.12 (s), 42.18 (s), 33.14 (s), 30.25 (s), 27.67 (s).

**Synthesis of 4-(1-(4-(9H-carbazol-9-yl)butyl)-1H-benzo[d]imidazol-2-yl)thiazole (TBZ-Bu-CBZ):**

In a two necked round bottom flask CBZ-C<sub>4</sub>-Br (2 mmol) was added in 25 mL of dry Toluene in N<sub>2</sub> atmosphere. To the solution 2 mmol of TBZ was added in room temperature stirred for 15 minutes. Triethyl amine (Et<sub>3</sub>N) of 3 mmol was taken as base. The reaction temperature was set upto 120°C and reflux for 24 hours. After completion of the reaction, the reaction mixture was

poured in ice water and Ethyl acetate and organic layer was separated. Pure white color compound was obtained by column chromatography.  $^1\text{H-NMR}$  Data (**400 MHz,  $\text{CDCl}_3$ ,  $\delta$  ppm**):  $\delta$  8.77 (d,  $J = 1.9$  Hz, 1H), 8.34 (d,  $J = 1.7$  Hz, 1H), 8.12 (d,  $J = 7.7$  Hz, 2H), 7.81 (d,  $J = 5.4$  Hz, 1H), 7.46 (t,  $J = 7.6$  Hz, 3H), 7.30 (dd,  $J = 19.3, 14.8, 7.7$  Hz, 6H), 4.75 (t,  $J = 6.6$  Hz, 2H), 4.33 (t,  $J = 6.2$  Hz, 2H), 2.01 – 1.97 (m, 2H), 0.91 (t,  $J = 6.7$  Hz, 2H).  $^{13}\text{C NMR}$  (**400 MHz,  $\text{CDCl}_3$ ,  $\delta$  ppm**):  $\delta$  152.86 (s), 152.86 (s), 140.32 (s), 140.32 (s), 125.70 (s), 130.58 102.58 (s), 84.04 – 69.83 (m), 43.61 (s), 28.45 (s). HRMS: Mass Calculated  $m/z = 423.54$  found  $m/z$  ratio = 424.16.

### Synthesis root of Eu (III) complexes:

The synthesis of Eu (III) chloride ( $\text{EuCl}_3 \cdot 6\text{H}_2\text{O}$ ) from europium (III) oxide is carried out. Synthesis of four complexes **Eu-1**, **Eu-2**, **Eu-3**, and **Eu-4** are carried out in the  $\text{N}_2$  atmosphere. In A 50 mL two-neck round-bottom flask  $\text{Eu}(\text{TTA})_3 \cdot 2\text{H}_2\text{O}$ / $\text{Eu}(\text{DBM})_3 \cdot 2\text{H}_2\text{O}$  (0.161g, 0.189 mmol, 1 equiv) was taken and dissolved with 20 mL dry THF and stirred for 15 minutes. A condenser was fitted with  $\text{N}_2$  containing a balloon to make the reaction condition inert. Another solution of ligand was prepared by taking 0.80 g, 0.189 mmol, of TBZ- $\text{CH}_2$ -Ph/TBZ-Bu-CBZ with the same solvent (5 mL) and added dropwise to the above solution. The temperature was set up to  $60^\circ\text{C}$  and the reaction mixture (RM) was stirred for 12 hours. After overnight reaction minimum amount of THF and an excess amount of hexane was added to the resulting product to get the precipitate. It was then dried over vacuumed drier and the product was collected. The same procedure was followed for  $\text{Eu}(\text{DBM})_3\text{L}$ . Finally, from the two ligands TBZ- $\text{CH}_2$ -Ph and TBZ-Bu-CBZ four complexes  $\text{Eu}(\text{TTA})_3$ -TBZ- $\text{CH}_2$ -Ph (**Eu-1**),  $\text{Eu}(\text{DBM})_3$ -TBZ- $\text{CH}_2$ -Ph (**Eu-2**),  $\text{Eu}(\text{TTA})_3$ -TBZ-Bu-CBZ (**Eu-3**), and  $\text{Eu}(\text{DBM})_3$ -TBZ-Bu-cbz (**Eu-4**) have been synthesized from the above procedure.

## NMR ( $^1\text{H}$ and $^{13}\text{C}$ )

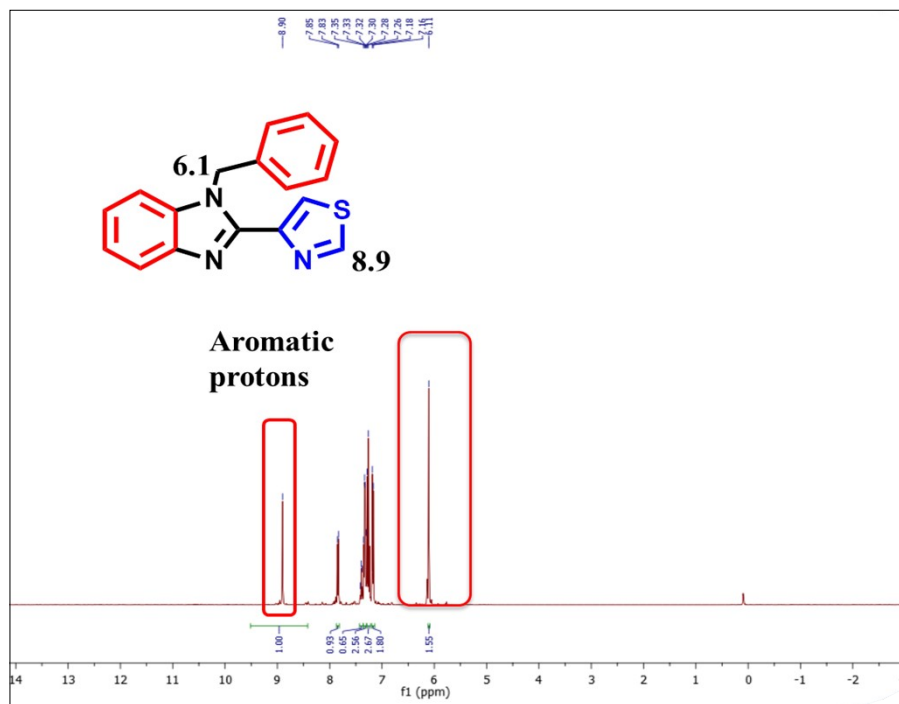

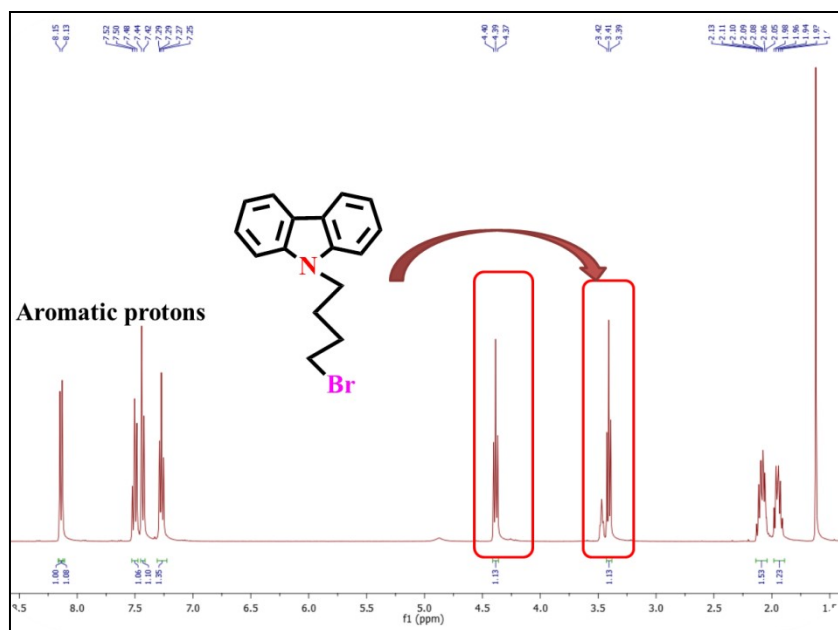

**Fig S3.**  $^1\text{H}$  NMR spectroscopy of **CBZ-C<sub>4</sub>-Br (Intermediate)** in  $\text{CDCl}_3$

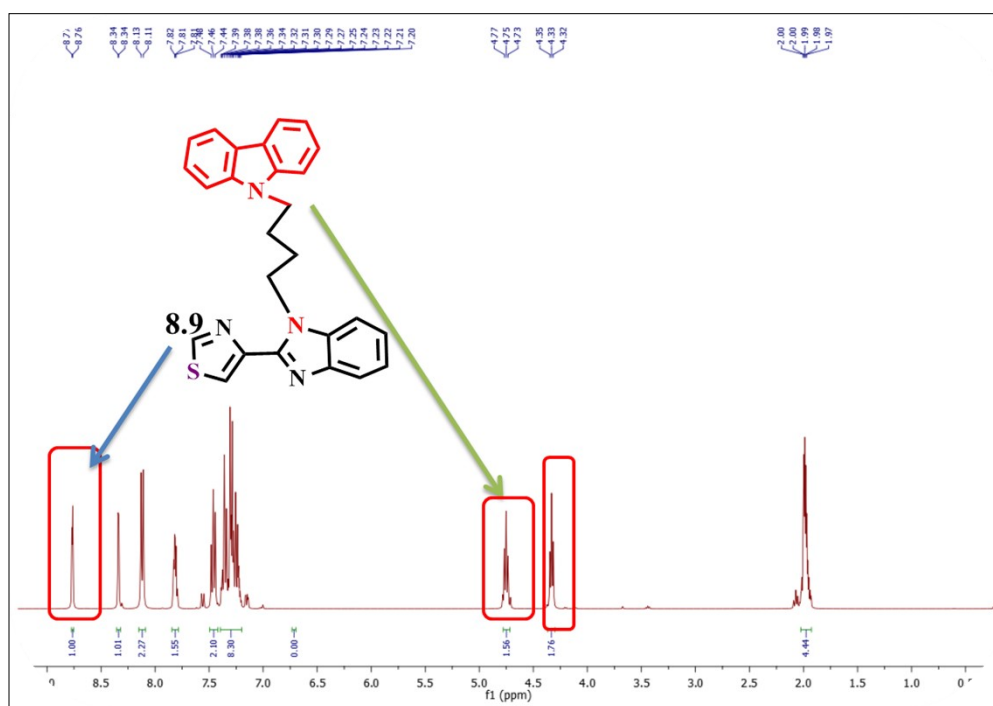

**Fig S4.**  $^1\text{H}$  NMR spectroscopy of **TBZ-Bu-CBZ** in  $\text{CDCl}_3$

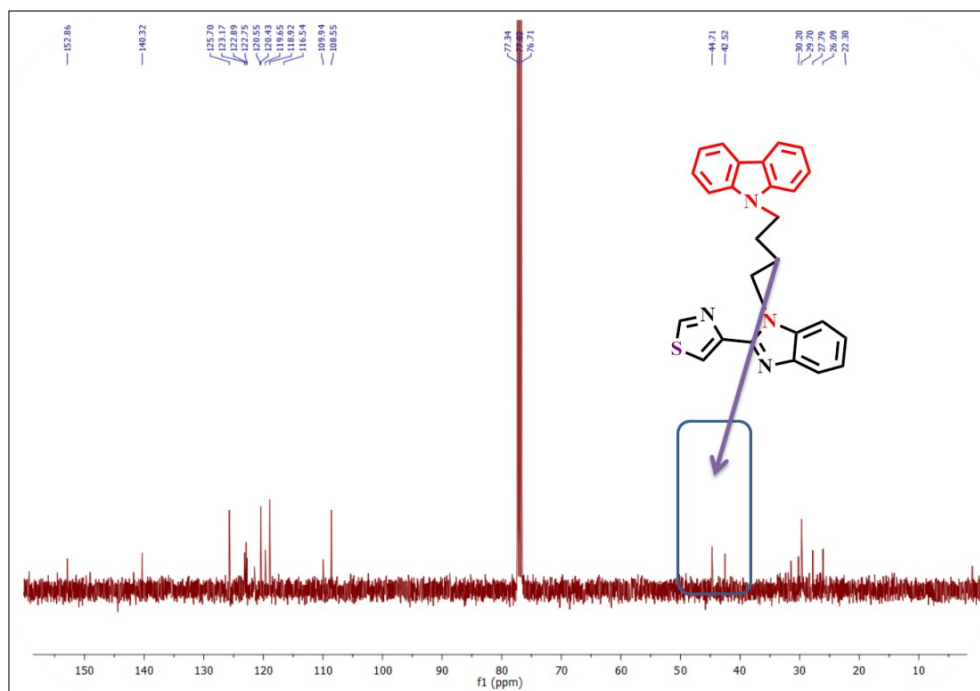

**Fig S5.**  $^{13}\text{C}$  NMR spectroscopy of TBZ-Bu-CBZ in  $\text{CDCl}_3$

### $^1\text{H}$ NMR of Eu-complexes

In  $^1\text{H}$  NMR, data of all the complexes are showing obvious changes relative to spectra of ligands due to paramagnetic nature of europium (III) ion. The proton signal of keto  $-\text{CH}_2$  protons peak at 4.22-4.5 ppm are disappeared from complexes spectra suggesting that the enolic  $-\text{OH}$  from  $\beta$ -diketone ligands involved in coordination process. The enolic  $-\text{CH}$  proton of all  $\beta$ -diketone have been a shifted to upfield at 3.30–2.50 ppm in complexes, suggesting the paramagnetic behavior of lanthanide ion. In addition to this multiplet peaks arise due to the overall aromatic protons present in ligand (ancillary and diketones) is now moved toward higher field as compared to free ligand. The obtained data giving obvious result of coordination of ligands with the metal ion

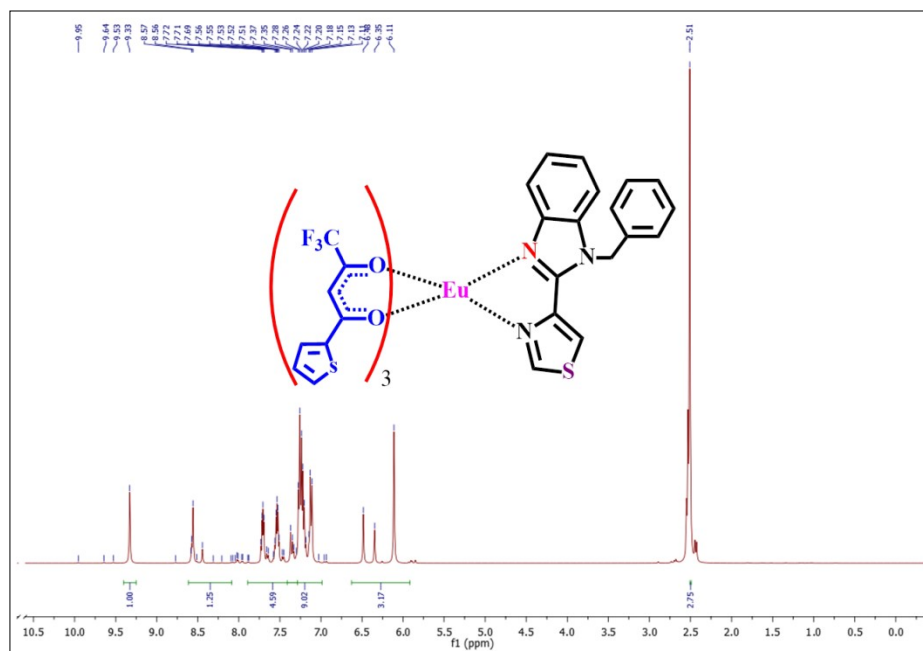

**Fig S6.**  $^1\text{H}$  NMR spectroscopy of  $\text{Eu}(\text{TTA})_3\text{TBZ-CH}_2\text{-Ph}$  in  $\text{DMSO-d}_6$

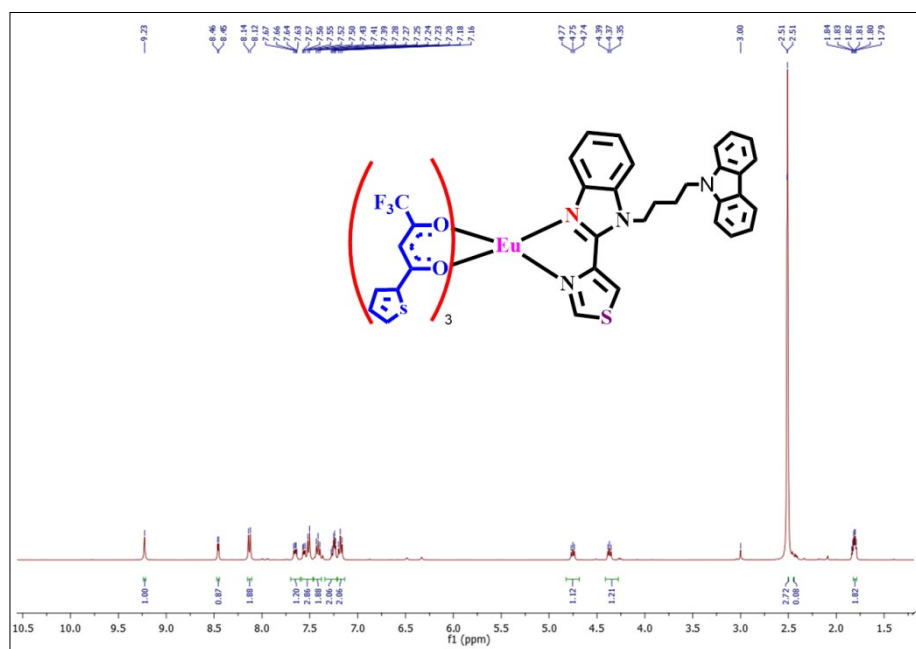

**Fig S7.**  $^1\text{H}$  NMR spectroscopy of  $\text{Eu}(\text{TTA})_3\text{TBZ-Bu-CBZ}$  in  $\text{DMSO-d}_6$

**Mass (HRMS) spectra:**

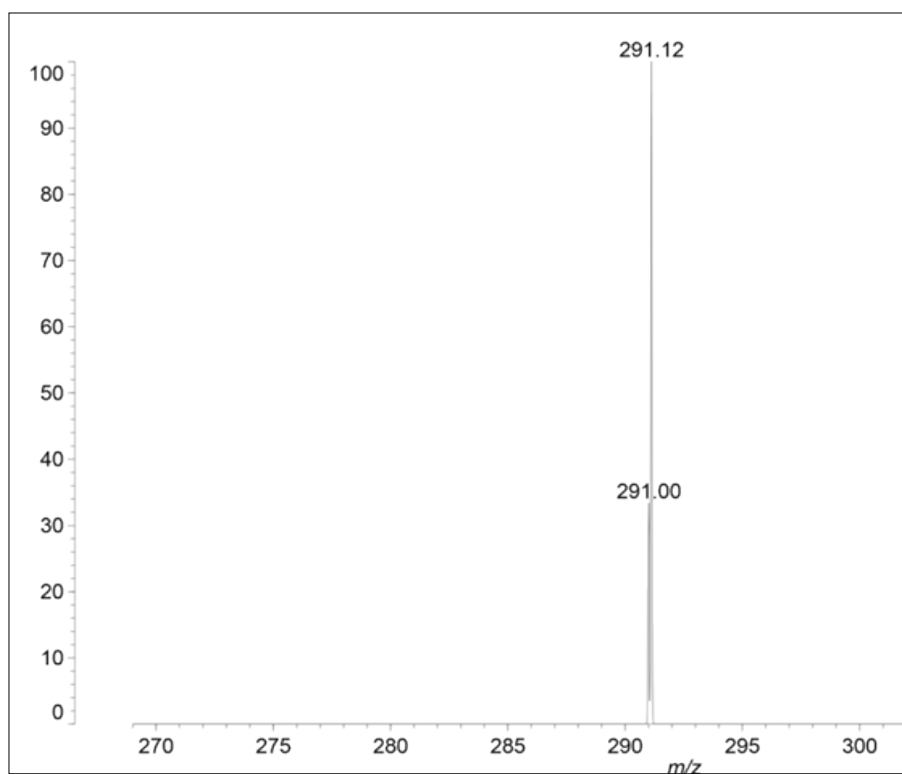

**Fig S8** Mass spectral data of TBZ-CH-Ph

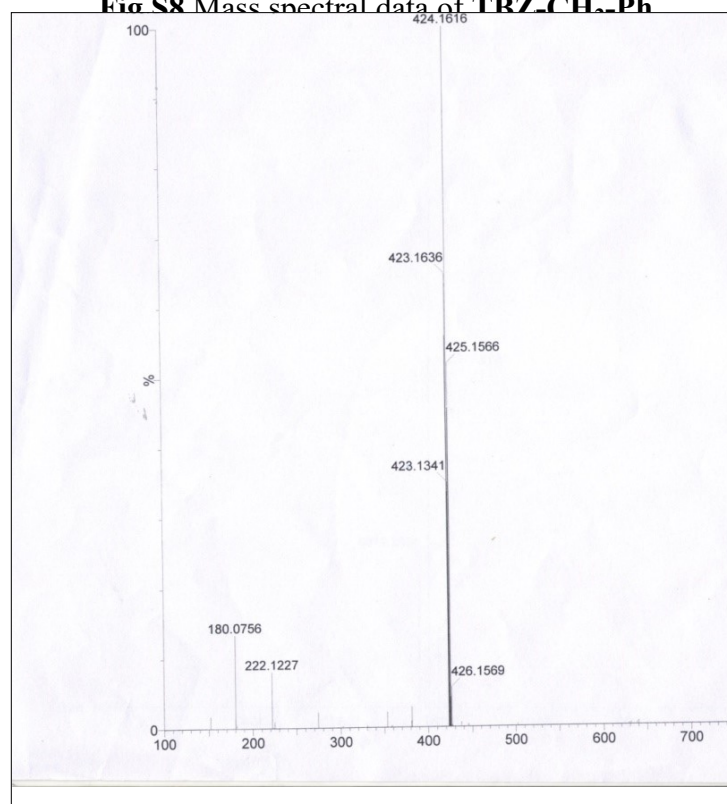

**Fig S9**.Mass spectral data of TBZ-Bu-CBZ

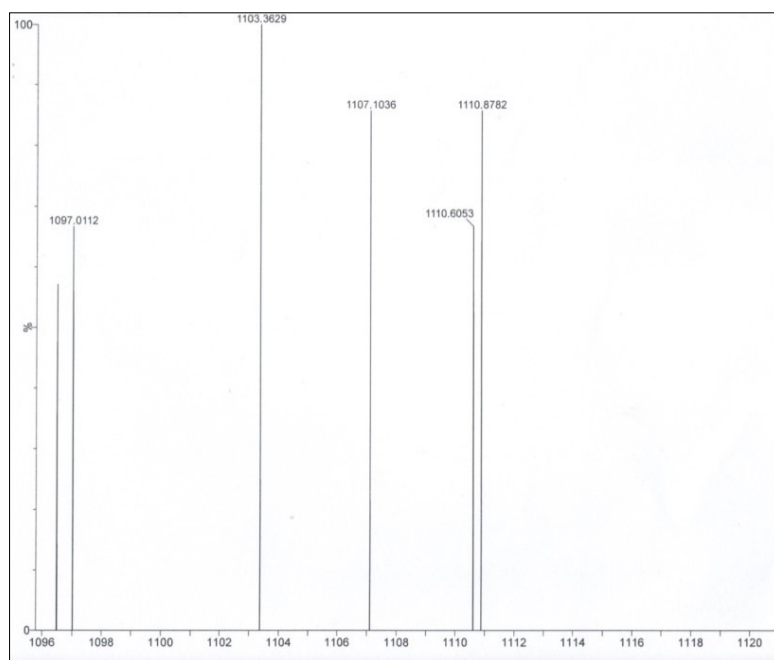

**Fig S10.**Mass spectral data of  $\text{Eu}(\text{TTA})_3\text{TBZ-CH}_2\text{-Ph}$

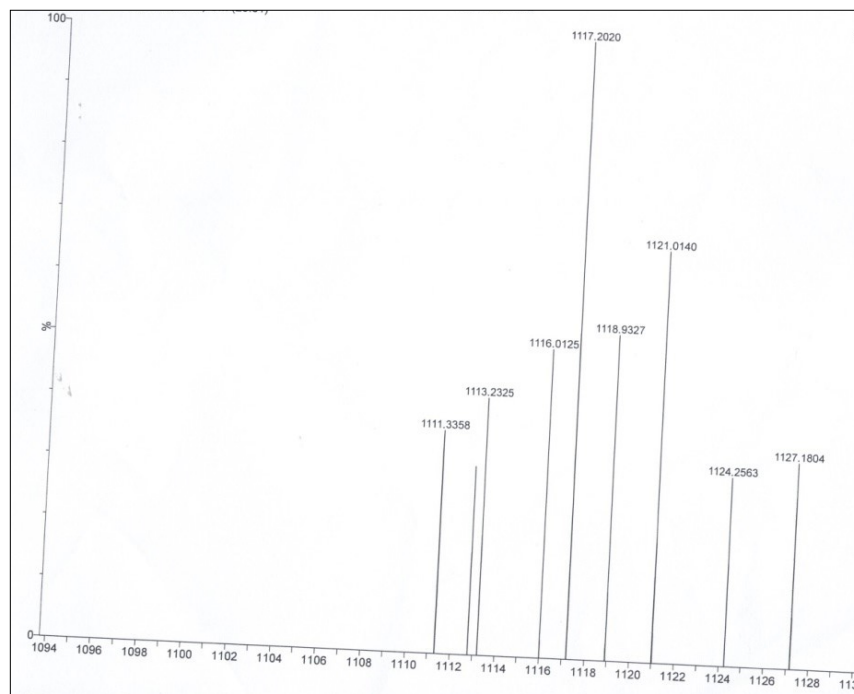

**Fig S11 .Mass spectral data of  $\text{Eu}(\text{DBM})_3\text{TBZ-CH}_2\text{-Ph}$**

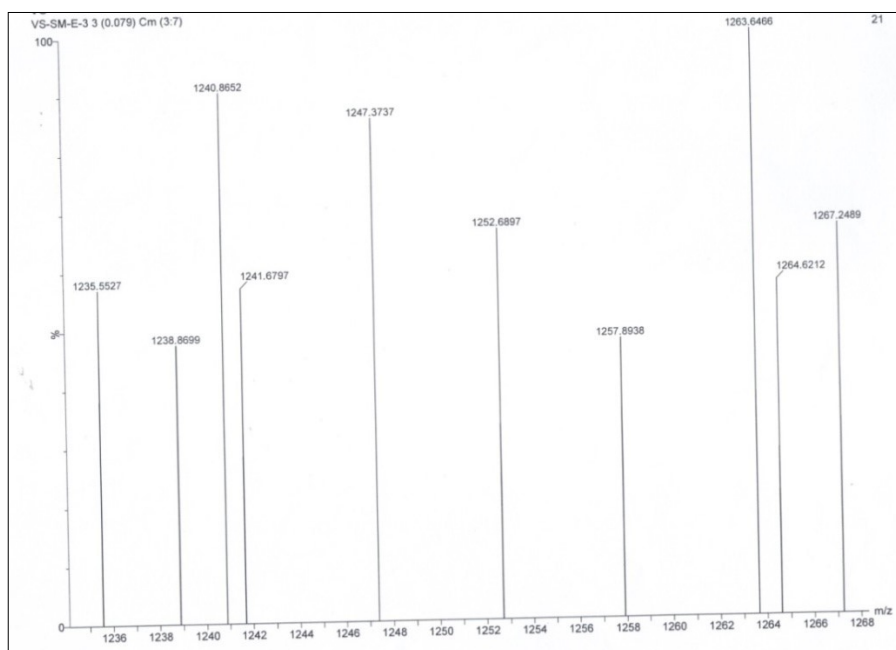

**Fig S12 .Mass spectral data of  $\text{Eu}(\text{TTA})_3\text{TBZ-Bu-CBZ}$**

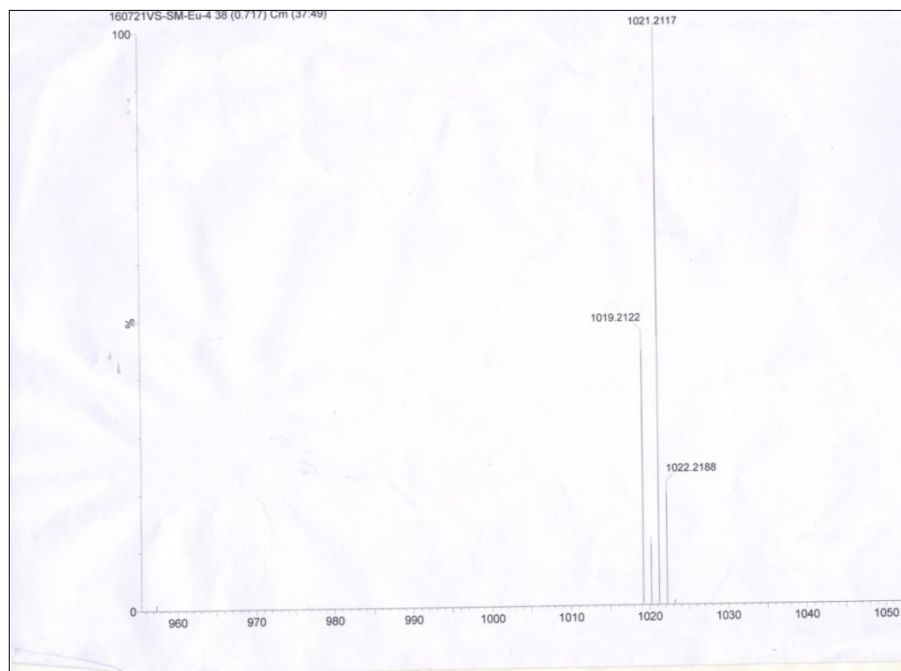

**Fig S13 .Mass spectral data of  $\text{Eu}(\text{DBM})_3\text{TBZ-Bu-CBZ}$**

## **FT-IR Spectra**

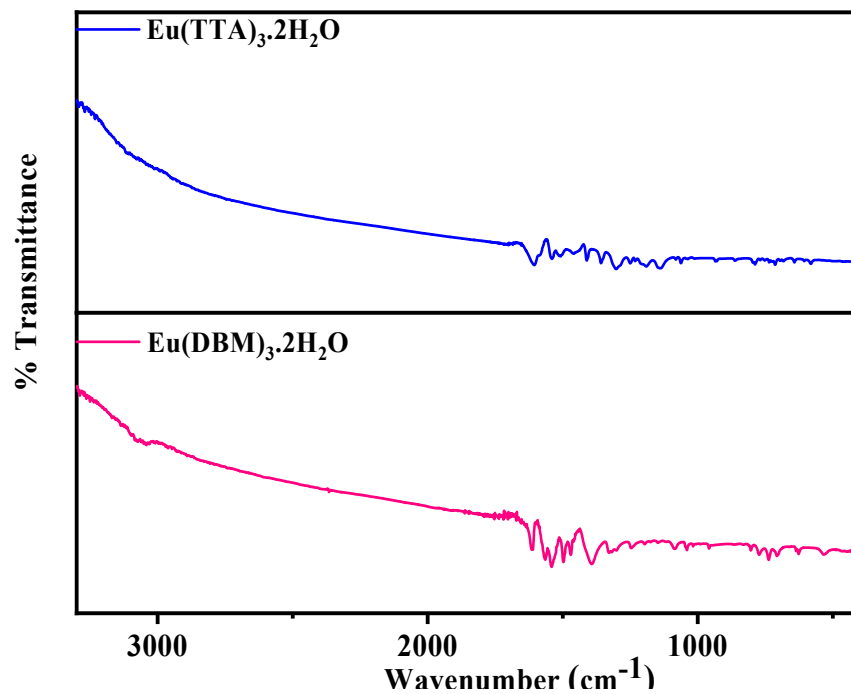

**Fig S14.** FTIR Spectra of  $\text{Eu}(\text{TTA})_3 \cdot 2\text{H}_2\text{O}$  and  $\text{Eu}(\text{DBM})_3 \cdot 2\text{H}_2\text{O}$ .

**PL spectra:**

**Solvatochromism study of ligands:**

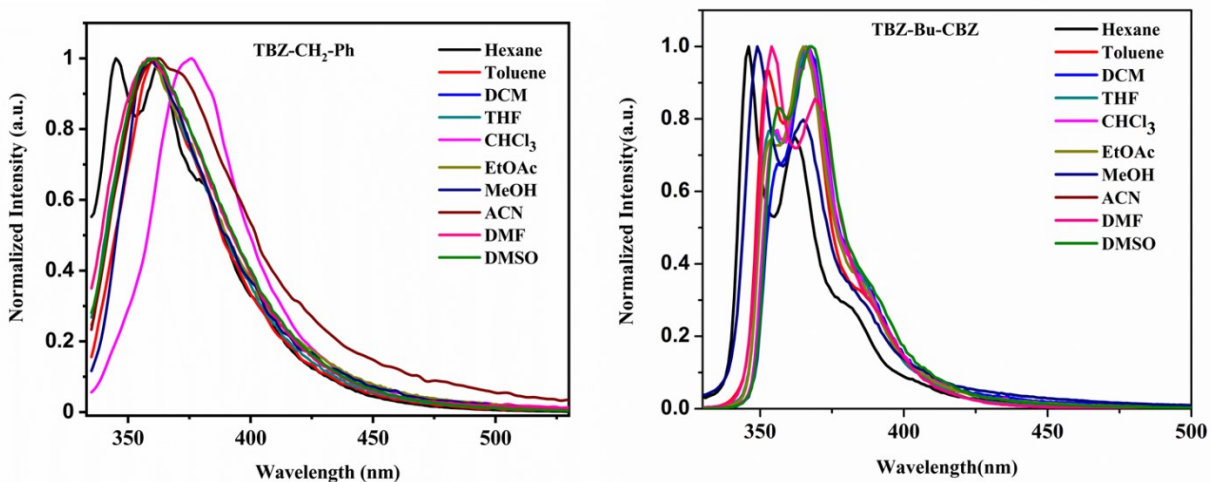

**Fig S15.** Solvatochromism PL emission spectra of all ligands

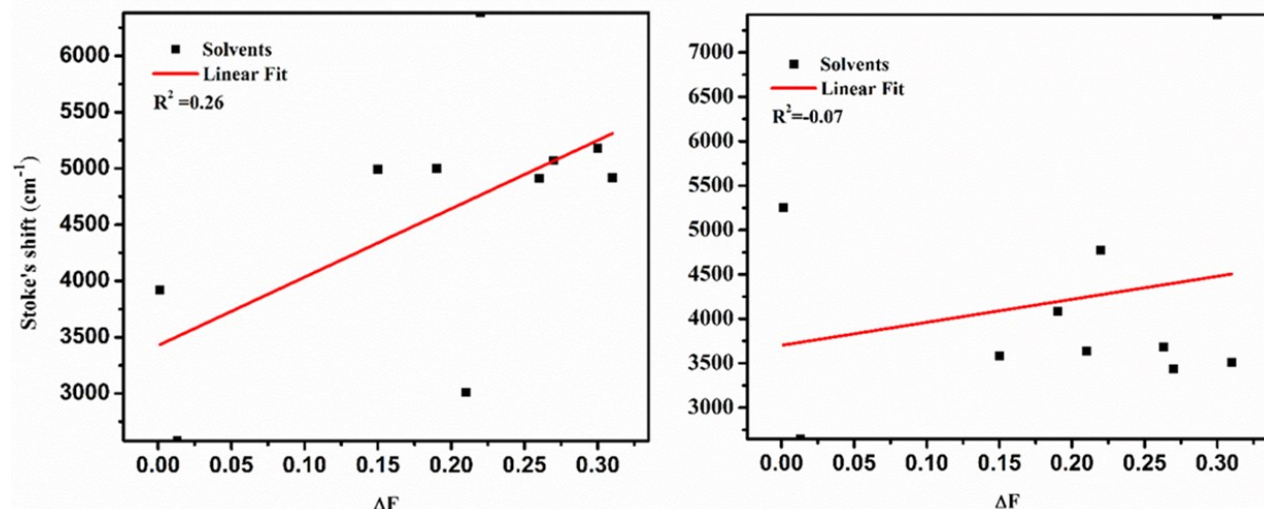

**Fig S16** Stokes shift of ligands  $\Delta\nu$  versus the Lippert solvent parameter  $\Delta f = f(\epsilon) - f(n_2)$  (The numbers refer to the solvents in Table S5). The straight line represents the linear fit to the 10 data points.

**Table ST1: PL spectral data of TBZ-CH<sub>2</sub>-Ph in various solvents**

| S.No. | Solvent           | $\lambda_{\text{abs}}$ (max) in nm | $\lambda_{\text{em}}$ (max) in nm | Stoke's shift ( $\Delta\nu$ ) in $\text{cm}^{-1}$ |
|-------|-------------------|------------------------------------|-----------------------------------|---------------------------------------------------|
| 1     | Hexane            | 304.29                             | 345.48                            | 3918                                              |
| 2     | Toluene           | 300.41                             | 352.63                            | 2578                                              |
| 3     | DCM               | 297.30                             | 366.93                            | 6382                                              |
| 4     | THF               | 319.62                             | 353.64                            | 3009                                              |
| 5     | CHCl <sub>3</sub> | 301.74                             | 355.23                            | 4991                                              |
| 6     | EtOAc             | 301.18                             | 355.23                            | 5000                                              |
| 7     | MeOH              | 297.74                             | 348.81                            | 4918                                              |
| 8     | ACN               | 300.74                             | 356.23                            | 5180                                              |
| 9     | DMF               | 301.74                             | 356.24                            | 5071                                              |
| 10    | DMSO              | 301.18                             | 353.36                            | 4912                                              |

**Table ST2: PL spectral data of TBZ-Bu-CBZ in various solvents**

| Sl.No. | Solvent         | $\lambda_{\text{abs}}$ (max) in nm | $\lambda_{\text{em}}$ (max) in nm | Stoke's shift ( $\Delta\nu$ ) in $\text{cm}^{-1}$ |
|--------|-----------------|------------------------------------|-----------------------------------|---------------------------------------------------|
| 1      | Hexane          | 292.74                             | 345.85                            | 5250                                              |
| 2      | Toluene         | 322.62                             | 352.63                            | 2646                                              |
| 3      | DCM             | 303                                | 355                               | 4772                                              |
| 4      | THF             | 315                                | 355                               | 3632                                              |
| 5      | $\text{CHCl}_3$ | 315                                | 355                               | 3580                                              |
| 6      | EtOAc           | 308                                | 353                               | 4082                                              |
| 7      | MeOH            | 294                                | 349                               | 3505                                              |
| 8      | ACN             | 281                                | 355                               | 7425                                              |
| 9      | DMF             | 317                                | 352                               | 2646                                              |
| 10     | DMSO            | 313                                | 354                               | 3682                                              |

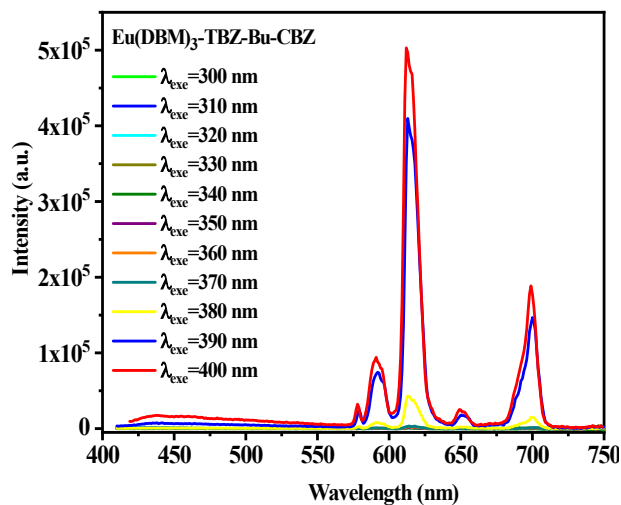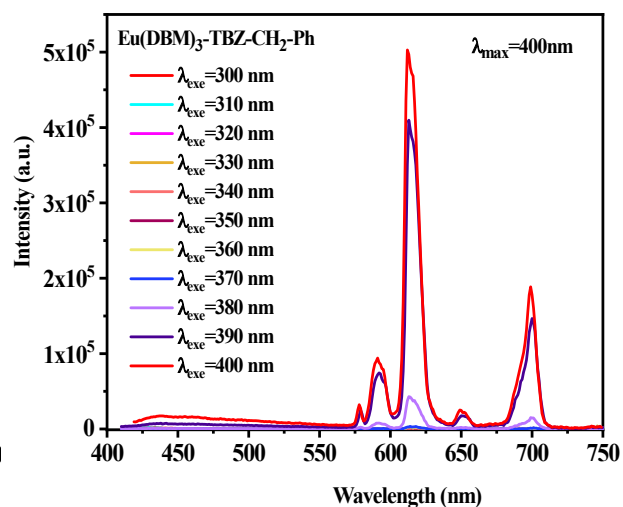

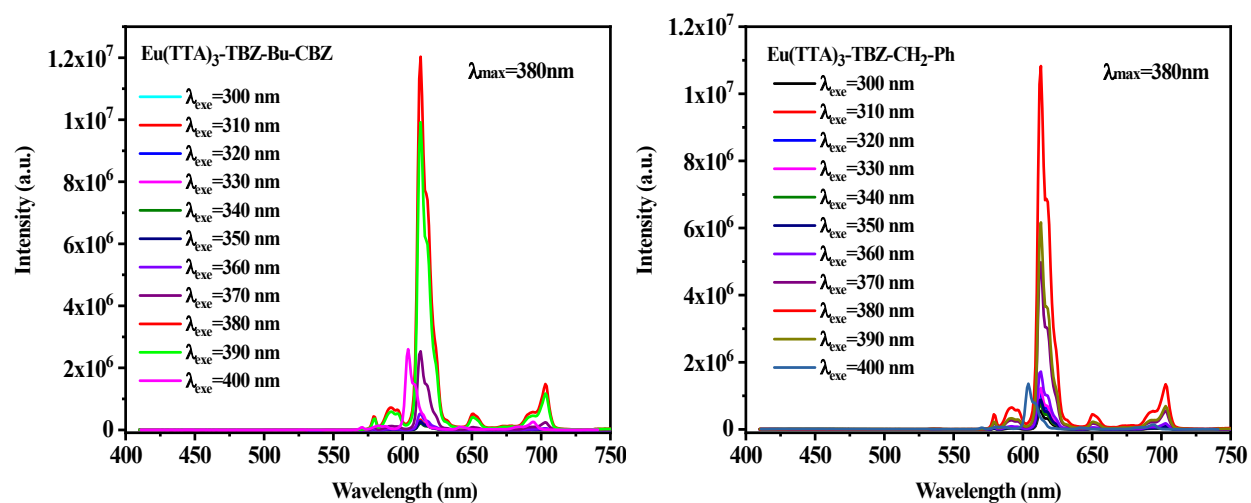

**Fig S17.** Emission Spectra of all the complexes (Eu-1-4) under excitation range 300 - 400

**Table ST3** CIE coordinates and color purity of complexes

| Code        | x      | y      | Color Purity (%) |
|-------------|--------|--------|------------------|
| <b>Eu-1</b> | 0.6692 | 0.3294 | 96.62            |
| <b>Eu-2</b> | 0.6692 | 0.3297 | 96.66            |
| <b>Eu-3</b> | 0.6695 | 0.3295 | 96.70            |
| <b>Eu-4</b> | 0.6570 | 0.3298 | 93.35            |

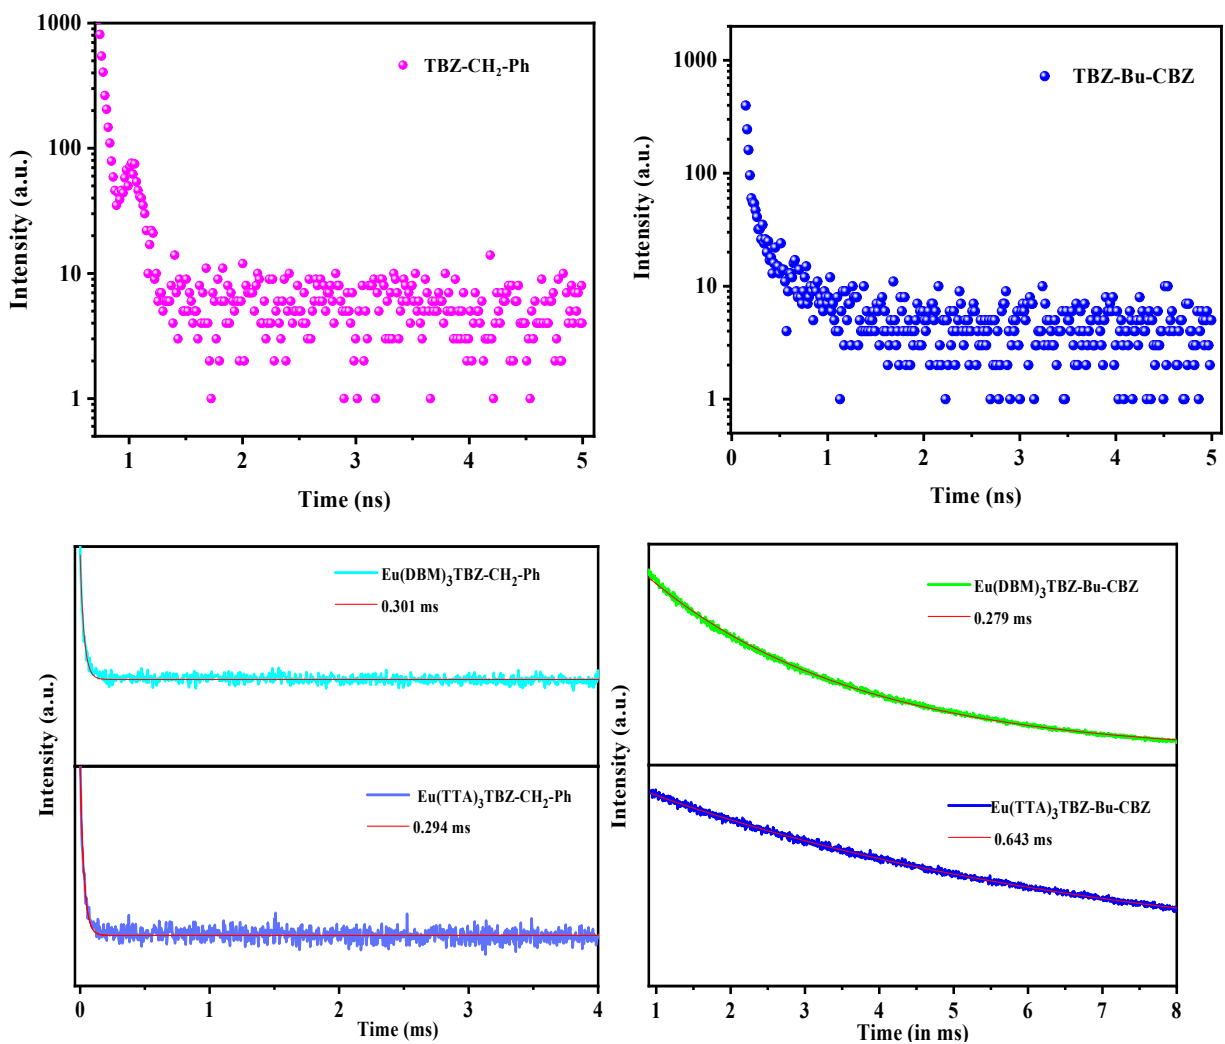

**Fig S18** Lifetime decay profile of ligands and their respective Eu(III) complexes

**Table ST4.** The calculated CIE from the PL emission data of Eu(III) complexes in different solvents and corresponding asymmetric ratio

| SOLVENT           | Eu-1           |       | Eu-2           |       | Eu-3           |      | Eu-4           |      |
|-------------------|----------------|-------|----------------|-------|----------------|------|----------------|------|
|                   | (x, y)         | AR    | (x, y)         | AR    | (x, y)         | AR   | (x, y)         | AR   |
| Hexane            | (0.612, 0.301) | 4.68  | (0.451, 0.229) | 4.85  | (0.600, 0.294) | 4.52 | (0.349, 0.173) | 4.27 |
| Toluene           | (0.666, 0.326) | 11.22 | (0.644, 0.324) | 14.88 | (0.590, 0.288) | 9.16 | (0.631, 0.316) | 3.56 |
| DCM               | (0.664, 0.330) | 10.83 | (0.638, 0.334) | 8.93  | (0.661, 0.330) | 6.22 | (0.656, 0.328) | 6.27 |
| THF               | (0.664, 0.324) | 8.49  | (0.638, 0.318) | 4.51  | (0.597, 0.290) | 7.22 | (0.383, 0.195) | 4.61 |
| CHCl <sub>3</sub> | (0.664, 0.329) | 3.50  | (0.406, 0.362) | 3.63  | (0.329, 0.205) | 3.39 | (0.596, 0.312) | 3.19 |
| EtOAc             | (0.665, 0.326) | 4.9   | (0.627, 0.312) | 4.01  | (0.417, 0.224) | 2.52 | (0.226, 0.130) | 4.03 |
| MeOH              | (0.666, 0.327) | 9.98  | (0.596, 0.307) | 7.84  | (0.643, 0.320) | 5.39 | (0.478, 0.247) | 4.47 |
| ACN               | (0.666, 0.326) | 14.02 | (0.658, 0.330) | 6.81  | (0.630, 0.319) | 5.37 | (0.504, 0.267) | 3.02 |
| DMF               | (0.670, 0.327) | 13.95 | (0.660, 0.327) | 5.99  | (0.664, 0.326) | 6.59 | (0.659, 0.324) | 4.28 |
| DMSO              | (0.668, 0.327) | 4.83  | (0.656, 0.325) | 4.48  | (0.650, 0.320) | 4.24 | (0.649, 0.320) | 4.82 |

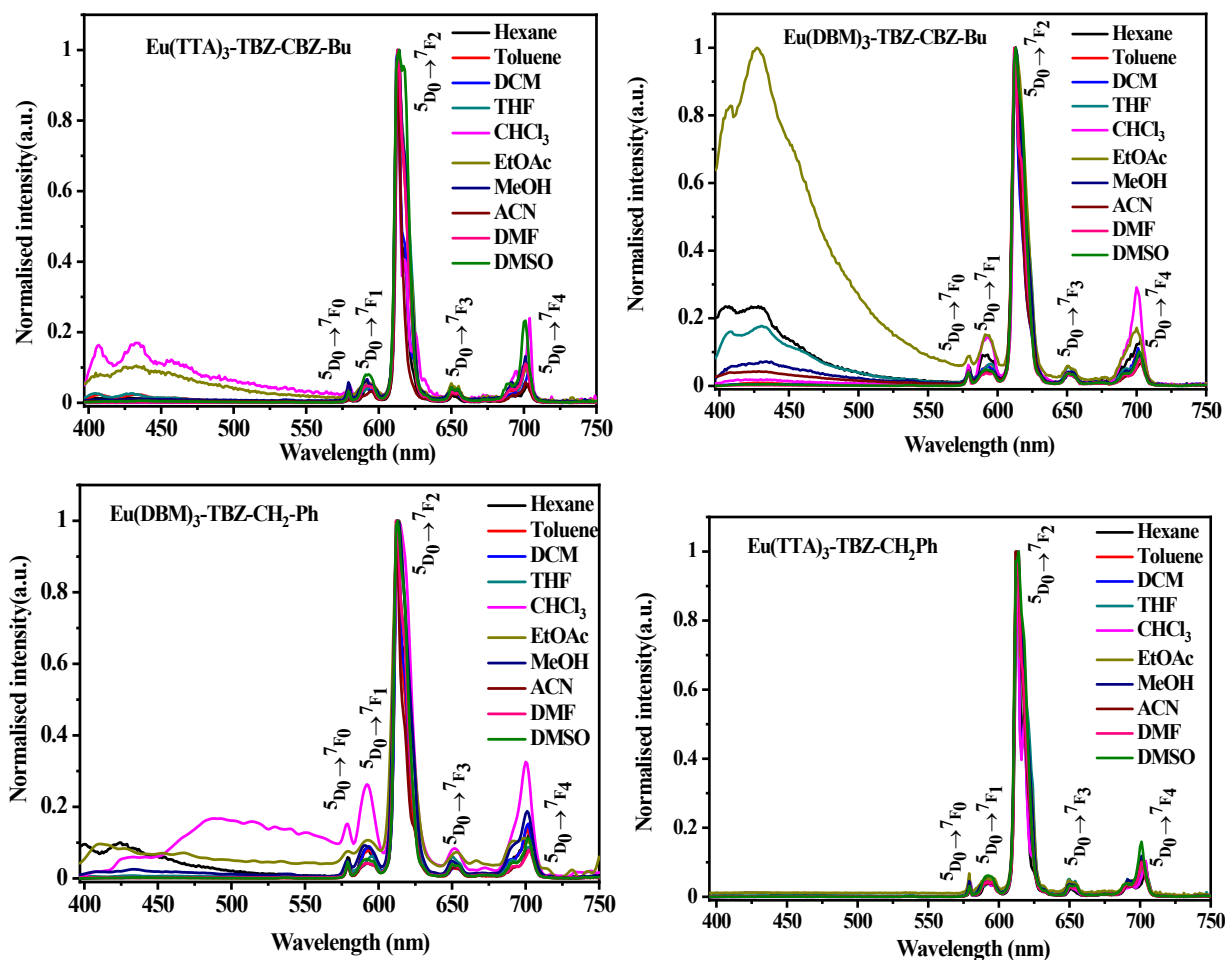

Fig S19 Solvatochromism study of complexes

Table ST5: Cyclic voltammetry study of ligands and complexes

| Sl. No. | Compound name           | Voltage ox <sub>onset</sub> [V]<br>(E <sub>HOMO</sub> [eV]) | Voltage red <sub>onset</sub> [V]<br>(E <sub>HOMO</sub> [eV]) | Energy gap<br>[eV] |
|---------|-------------------------|-------------------------------------------------------------|--------------------------------------------------------------|--------------------|
| 1       | TBZ-CH <sub>2</sub> -Ph | 1.71 (-5.875)                                               | -1.81 (-2.69)                                                | 3.12               |
| 2       | CBZ-Bu-TBZ              | 1.49 (-5.89)                                                | -1.72 (-2.68)                                                | 3.21               |
| 3       | Eu-1                    | 1.32 (-5.72)                                                | -1.85 (-2.55)                                                | 3.0                |
| 4       | Eu-2                    | 1.64 (-6.04)                                                | -1.39 (-3.01)                                                | 3.03               |
| 5       | Eu-3                    | 1.56 (-5.96)                                                | -1.34 (-3.06)                                                | 2.9                |
| 6       | Eu-4                    | 1.39 (-5.79)                                                | -1.46 (-2.94)                                                | 2.85               |

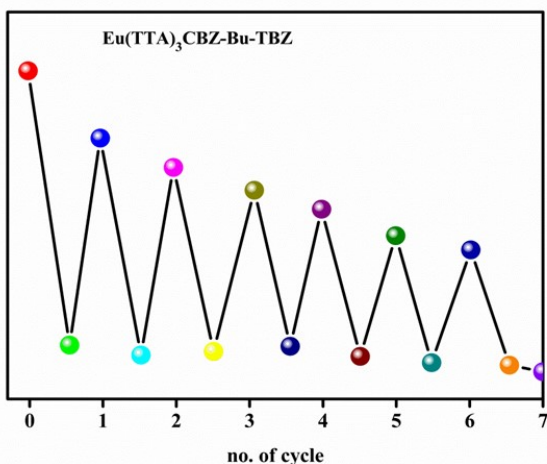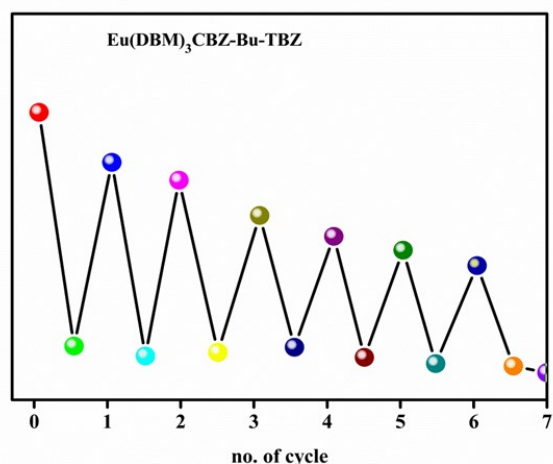

**Fig S20** The reversible cycle for luminance switches are shown in

### Judd-Ofelt (J –O) analysis:

The Judd-Ofelt parameters investigation of the emission spectrum is a potent tool for calculating the parity forbidden electric-dipole radiative transition rates between the different levels of the lanthanide ions. To study the chemical environment impact on the luminescent characteristics of the Eu<sup>3+</sup> ions, it is probable to analyze the  $\Omega_\lambda$  ( $\lambda = 2, 4$ ) parameters from the emission spectra by the standard calculation method. The experimental intensity parameters were calculated for the  $^5D_0 \rightarrow ^7F_2$  and  $^5D_0 \rightarrow ^7F_4$  transitions by maintaining  $^5D_0 \rightarrow ^7F_1$  transition as a reference. The following equation explains the relationship between the radiative emission rate and integrated emission intensity. <sup>1</sup>

$$\frac{A_{0-2,4}}{A_{0-1}} = \frac{I_{0-2,4} h\nu_{0-1}}{I_{0-1} h\nu_{0-2,4}, \dots \dots \dots (1)}$$

Where  $I_{0-J}$  is the area under the spectral curve and  $h\nu_{0-J}$  is the energy related to the  $^5D_0 \rightarrow ^7F_J$  ( $J = 1, 2, 4$ ) transition of Eu<sup>3+</sup>. The magnetic dipole radiative ( $^5D_0 \rightarrow ^7F_2$ ) transition rate  $A_{0-1}$  was considered as 50s<sup>-1</sup>. The above relation was given the probability of the electric dipole

transition. The radiative transition probability of forced electric dipole transitions ( $^5D_0 \rightarrow ^7F_2$ ) as a function of Judd–Ofelt intensity parameter is expressed as:

$$A = \frac{64\pi^4(\nu_{0-2,4})^3}{3hc^3} \sum_{\lambda=2,4} \chi \Omega_{\lambda} |\langle ^5D_0 \| U^{(\lambda)} \| ^7F_{2,4} \rangle|^2 \dots\dots\dots (2)$$

Where  $\chi$  is the Lorentz local field correction factor which is a function of refractive index  $n = 2.02$  of the host and is given by the relation  $\chi = n(n^2 + 2)^2/9$ .  $|\langle ^5D_0 \| U^{(\lambda)} \| ^7F_2 \rangle|^2$  is the square reduced matrix elements, independent of the chemical environment of the  $Eu^{3+}$  ion. The values of non-zero square reduced matrix  $U^{(2)} = 0.0032$  for  $^5D_0 \rightarrow ^7F_2$  transition and  $U^{(4)} = 0.0023$  for  $^5D_0 \rightarrow ^7F_4$  transition were taken for the present calculations. The  $\Omega_2$  parameter is more sensitive towards symmetry and angular part in spherical harmonics and  $\Omega_4$  is more sensible to the distance between ligand and metal ion. Inclusion of chemical bond overlap polarizability ( $\alpha_{OP}$ ) in dynamic coupling (DC) mechanism helps to quantify covalency of Eu(III) - ligand bond.  $\alpha_{OP}$  contribution to DC mechanism is 1% for  $\Omega_2$  and 2-8% for  $\Omega_4$ . Therefore,  $\Omega_4$  parameter is a better probe to measure the covalency in Eu(III) - ligating atom bond than that of  $\Omega_2$  intensity parameter

### Phosphorescence spectra in 77k

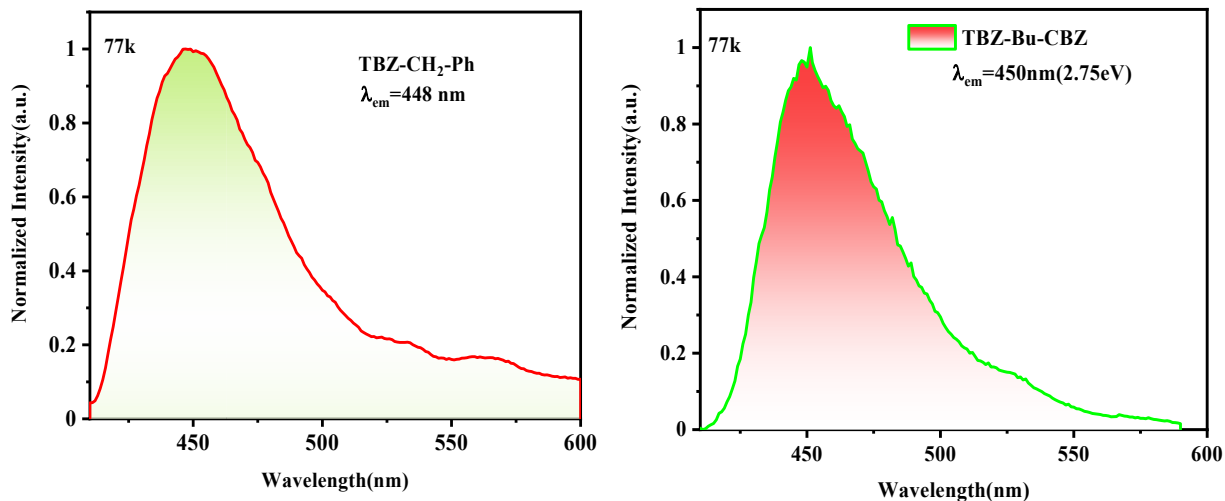

**Fig S21** Phosphorescence emission spectra of ligands in 77k.

### Cytotoxicity assay

The MTT assay was performed on the human lung cancer cell (A549) line to determine the cytotoxic potential of Eu- complexes. Initially, the A549 cells at the concentration of ( $10^6$  cells/well) were seeded into 96 well plates and kept for starvation for the period of 1 hr at 37C. Various concentration of (100, 50, 25, 12, 6  $\mu\text{m}/100\mu\text{l}$ ) Eu-1, Eu-2, Eu-3, Eu-4 complexes and as well as two ligands alone were treated with cells for 24 hr at 37°C. After the incubation period, the cells were treated with 0.5mg/ml MTT with plain media and incubated at 37C for 4 hr. Then, the solution was removed and mixed with 200  $\mu\text{l}$  DMSO to dissolve the formazan crystal. The optical density was read at 570 nm using microplate reader (Multiskan SkyHigh Microplate Spectrophotometer).

**MTT assay**  
**A549 Cell line**

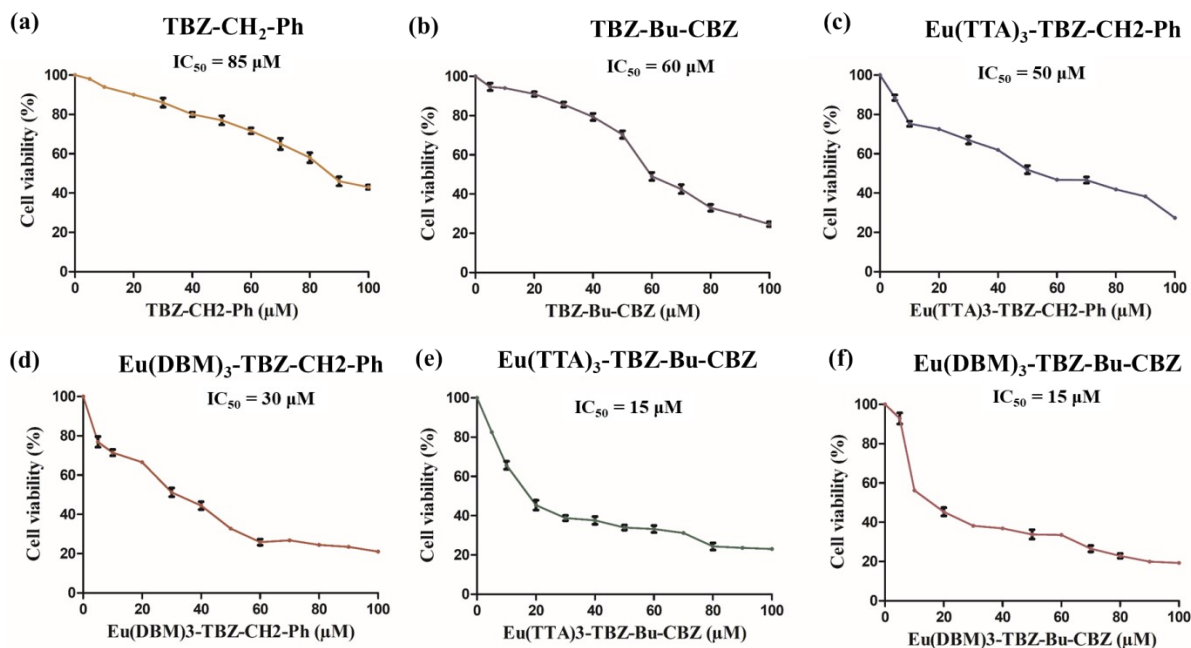

**Fig S22(a).** Cytotoxicity study of ligands and complexes in A549 with  $IC_{50}$  values

**HacaT Cell line**

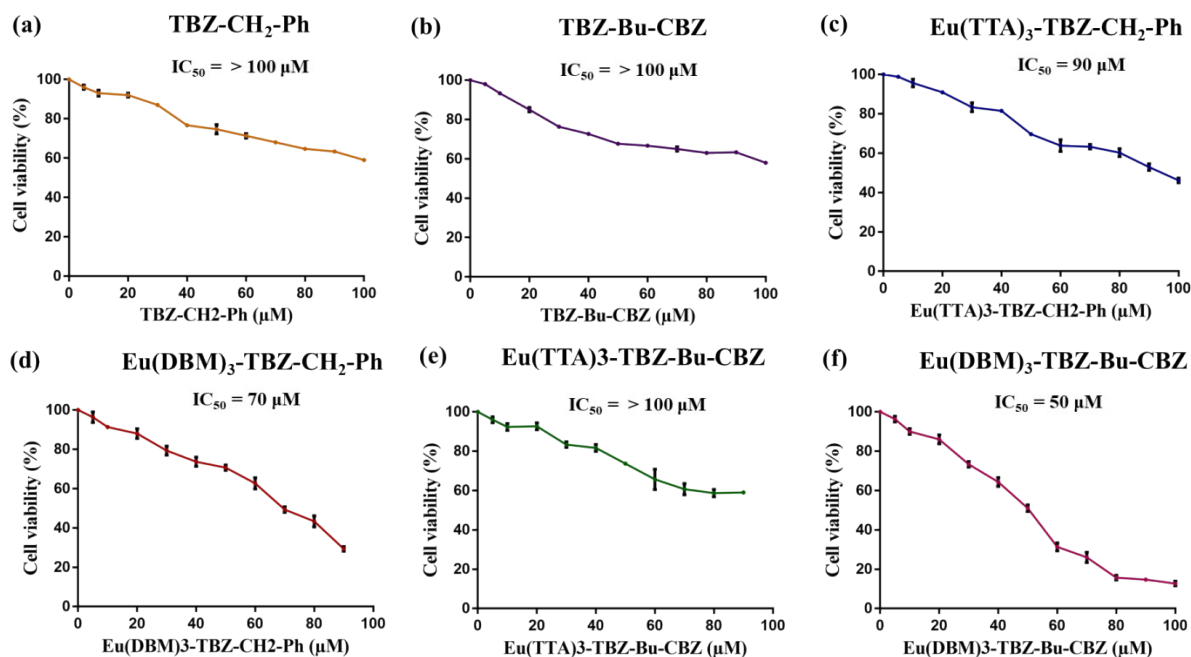

**Fig S22(b).** Cytotoxicity study of ligands and complexes in A549 with  $IC_{50}$  values

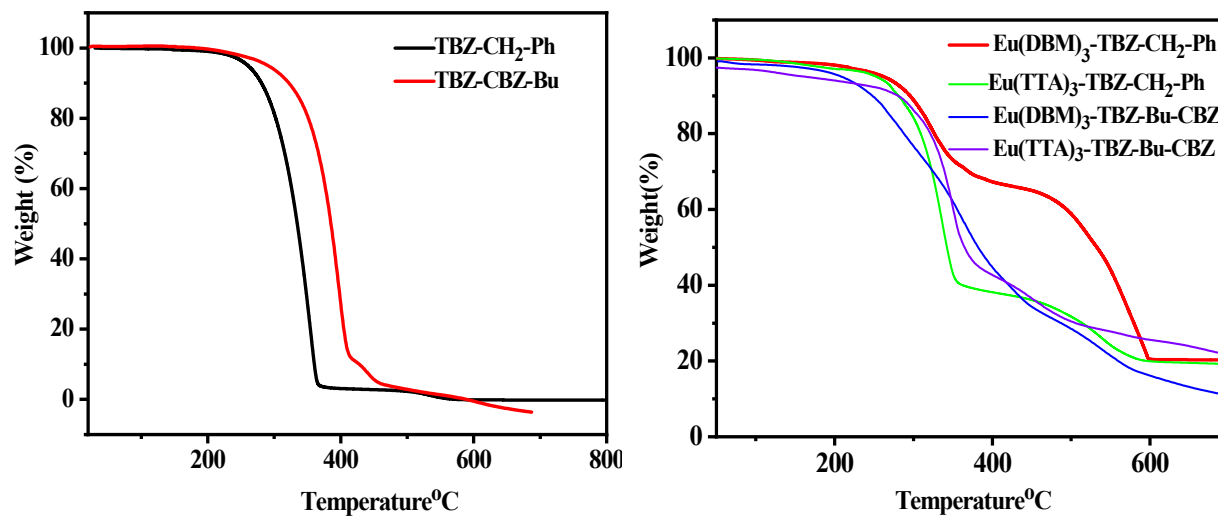

**Fig S23.** Thermograms of ligands and complexes

**Table ST6(a).** The input and output of on-of –of switches mechanisim.

| Input-1<br>HCl<br>Vapors | Input-2<br>Et <sub>3</sub> N<br>Vapors | Output<br>Ligands<br>Emission | Output<br>Eu(III)<br>Emission |
|--------------------------|----------------------------------------|-------------------------------|-------------------------------|
| 0                        | 0                                      | 0                             | 1                             |
| 1                        | 0                                      | 1                             | 0                             |
| 0                        | 1                                      | 0                             | 1                             |
| 1                        | 1                                      | 0                             | 1                             |

**Table ST6(b).** The Eu-complex response time for acid-base interaction

| Complexes | Response Time For HCl | Response Time For base |
|-----------|-----------------------|------------------------|
| Eu-3      | 53 sec                | 41 sec                 |
| Eu-4      | 48 sec                | 35 sec                 |

**DFT Study:**

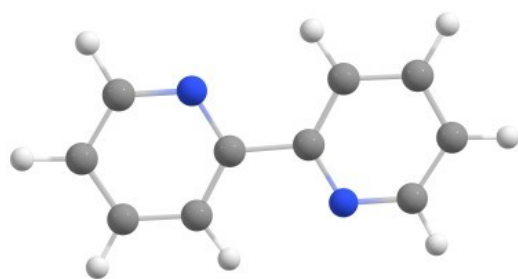

**Bipyridyl**  
 $T_1 = 25164 \text{ cm}^{-1}$   
 $S_1 = 34037 \text{ cm}^{-1}$

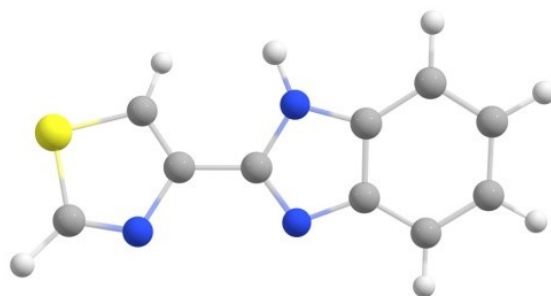

**TBZ**  
 $T_1 = 23229 \text{ cm}^{-1}$   
 $S_1 = 33880 \text{ cm}^{-1}$

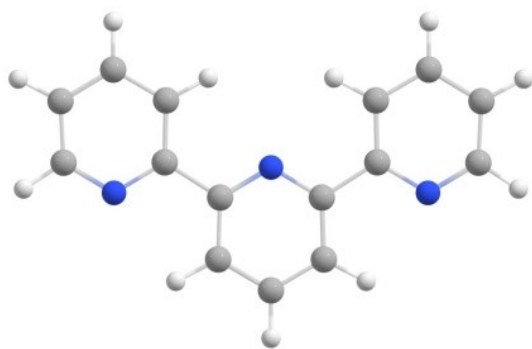

**Terpyridyl**  
 $T_1 = 23713 \text{ cm}^{-1}$   
 $S_1 = 33909 \text{ cm}^{-1}$

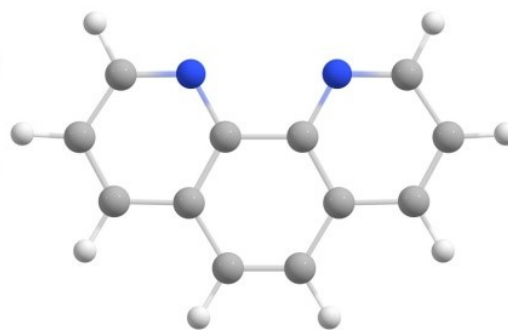

**Phen**  
 $T_1 = 21777 \text{ cm}^{-1}$   
 $S_1 = 29197 \text{ cm}^{-1}$

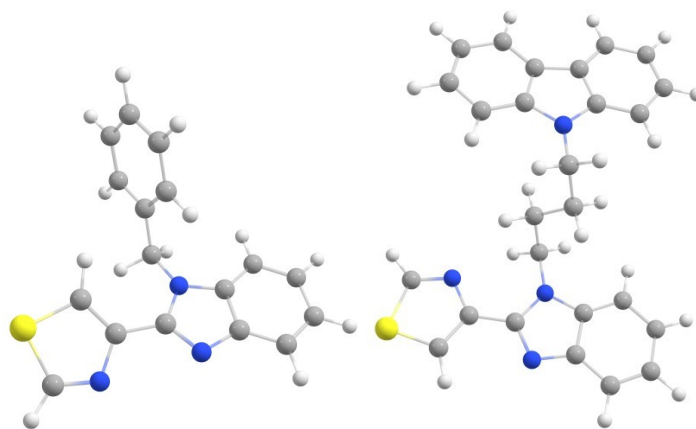

**TBZ-CH<sub>2</sub>-Ph**

**Tbz-Bu-CBZ**

**Fig S24.** Optimized Structures of presently ligands

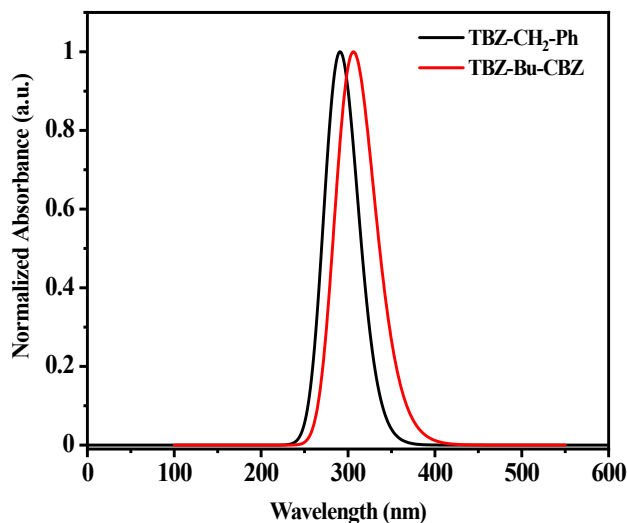

**Fig S25.** UV obtained from theoretical analysis by DFT study.

**Table ST7** Singlet triplet energy values, vertical transition, and oscillatory strength of ligands obtained from DFT

| Ligands                 | State   | Energy (eV)              | $\lambda_{\text{max}}$ (nm) | $f$    | Configuration                                                                                                               |
|-------------------------|---------|--------------------------|-----------------------------|--------|-----------------------------------------------------------------------------------------------------------------------------|
| TBZ-CH <sub>2</sub> -Ph | Triplet | 3.04 (T <sub>1</sub> )   | 407.00                      | 0      | HOMO-1→LUMO+2(10.05%)<br>HOMO→LUMO (61.8)                                                                                   |
|                         |         | 3.49 (T <sub>2</sub> )   | 339.75                      | 0      | HOMO-1→LUMO (45.01%)<br>HOMO→LUMO+25(15.70%)<br>HOMO→LUMO+2(27.81%)                                                         |
|                         |         | 3.76 (T <sub>3</sub> )   | 329.18                      | 0      | HOMO-4→LUMO+1 (24.53%)<br>HOMO-3→LUMO+25(24.53%)<br>HOMO-3→LUMO+3(31.94%)<br>HOMO-2→LUMO+1(40.74%)<br>HOMO-2→LUMO+3(28.39%) |
| Singlet                 | Gas     | 4.25 (S <sub>1</sub> )   | 291.60                      | 0.2718 | HOMO→LUMO (69.05%)                                                                                                          |
|                         |         | 4.32 (S <sub>2</sub> )   | 286.71                      | 0.0367 | HOMO-1→LUMO (69.01%)<br>HOMO→LUMO+5 (11.13%)                                                                                |
|                         |         | 3.1722 (S <sub>3</sub> ) | 262.57                      | 0.0033 | HOMO→LUMO+1 (70.09%)                                                                                                        |

|                              |     |                            |        |         |                                                                                                                              |
|------------------------------|-----|----------------------------|--------|---------|------------------------------------------------------------------------------------------------------------------------------|
| <b>Tbz-Bu-CBZ</b><br>Triplet | Gas | 2.79<br>(T <sub>1</sub> )  | 442.91 | 0       | HOMO-6→LUMO(19.79%)<br>HOMO-1→LUMO (64.53%)                                                                                  |
|                              |     | 3.17<br>(T <sub>2</sub> )  | 390.72 | 0       | HOMO-7→LUMO+8 (12.72%)<br>HOMO-4→LUMO+1 (15.26%)<br>HOMO-4→LUMO+6 (10.45%)<br>HOMO-2→LUMO+1 (61.41%)<br>HOMO→LUMO+4 (11.74%) |
|                              |     | 3.28<br>(T <sub>3</sub> )  | 377    | 0       | HOMO-1→LUMO+1(68.51%)                                                                                                        |
| Singlet                      | Gas | 3.679<br>(S <sub>1</sub> ) | 336.99 | 0.0010  | HOMO→LUMO (70.67%)                                                                                                           |
|                              |     | 3.95<br>(S <sub>2</sub> )  | 313.70 | 0.00382 | HOMO-2→LUMO+3(14.19%)<br>HOMO-1→LUMO+1(48.81%)                                                                               |
|                              |     | (S <sub>3</sub> )          | 308.30 | 0.1827  | HOMO-1→LUMO (67.83%)                                                                                                         |

### XYZ Coordinates

#### TBZ-CH<sub>2</sub>-Ph

|   |             |              |              |
|---|-------------|--------------|--------------|
| C | 2.061756000 | -0.243529000 | -0.322255000 |
| C | 2.324574000 | -1.487352000 | 0.293125000  |
| C | 3.638789000 | -1.839066000 | 0.620467000  |
| C | 4.650348000 | -0.939104000 | 0.316427000  |
| C | 4.371428000 | 0.295250000  | -0.300295000 |
| C | 3.072978000 | 0.667422000  | -0.629412000 |
| C | 0.205259000 | -1.420540000 | -0.010207000 |
| H | 3.843055000 | -2.791994000 | 1.093219000  |
| H | 5.677783000 | -1.186558000 | 0.557591000  |
| H | 5.187691000 | 0.974152000  | -0.519065000 |
| H | 2.865550000 | 1.626310000  | -1.089731000 |

|   |              |              |              |
|---|--------------|--------------|--------------|
| C | -1.216804000 | -1.782921000 | -0.005702000 |
| C | -0.017651000 | 0.806372000  | -1.273257000 |
| H | -0.885355000 | 0.336021000  | -1.740781000 |
| H | 0.641571000  | 1.120715000  | -2.088803000 |
| N | 0.688677000  | -0.211305000 | -0.512099000 |
| N | 1.150579000  | -2.189891000 | 0.471849000  |
| C | -0.461605000 | 2.029382000  | -0.482182000 |
| C | -0.151923000 | 2.203419000  | 0.866820000  |
| C | -1.206144000 | 3.016136000  | -1.138847000 |
| C | -0.579156000 | 3.344380000  | 1.547533000  |
| H | 0.426717000  | 1.450359000  | 1.388069000  |
| C | -1.631682000 | 4.153389000  | -0.460741000 |
| H | -1.455266000 | 2.892324000  | -2.188728000 |
| C | -1.318525000 | 4.321107000  | 0.888176000  |
| H | -2.208194000 | 4.908387000  | -0.983422000 |
| H | -1.649313000 | 5.206780000  | 1.418387000  |
| N | -1.562899000 | -3.110453000 | -0.169939000 |
| C | -2.273966000 | -0.930796000 | 0.194236000  |
| C | -2.842474000 | -3.268852000 | -0.100181000 |
| S | -3.762209000 | -1.804871000 | 0.176499000  |
| H | -2.259968000 | 0.129010000  | 0.392193000  |
| H | -3.345333000 | -4.220499000 | -0.209259000 |
| H | -0.329295000 | 3.466288000  | 2.595452000  |

**TBZ-Bu-CBZ**

|   |              |              |              |
|---|--------------|--------------|--------------|
| C | -2.847545000 | -1.999518000 | -0.380624000 |
| C | -4.093605000 | -1.919955000 | 0.283078000  |
| C | -4.753822000 | -3.089346000 | 0.679977000  |
| C | -4.152421000 | -4.306578000 | 0.398468000  |
| C | -2.913404000 | -4.372030000 | -0.267768000 |
| C | -2.239825000 | -3.224266000 | -0.666931000 |
| C | -3.500802000 | 0.099482000  | -0.127860000 |
| H | -5.708496000 | -3.027001000 | 1.188204000  |
| H | -4.641843000 | -5.227886000 | 0.692799000  |
| H | -2.473872000 | -5.341183000 | -0.474254000 |
| H | -1.286661000 | -3.290771000 | -1.177055000 |
| C | -3.568973000 | 1.560035000  | -0.192691000 |
| C | -4.640282000 | 2.266559000  | 0.293924000  |
| C | -2.866307000 | 3.592623000  | -0.695409000 |
| H | -5.522985000 | 1.865892000  | 0.763669000  |
| H | -2.231868000 | 4.382895000  | -1.072744000 |
| C | -1.241380000 | -0.283350000 | -1.319684000 |
| H | -1.479580000 | 0.539311000  | -1.990332000 |
| H | -0.929624000 | -1.134119000 | -1.930058000 |
| C | -0.109899000 | 0.146006000  | -0.378304000 |
| H | 0.721029000  | 0.481180000  | -1.007965000 |
| H | -0.443886000 | 1.023118000  | 0.183306000  |
| C | 0.375317000  | -0.946140000 | 0.579372000  |
| H | 0.708835000  | -1.819590000 | 0.008853000  |
| H | -0.451715000 | -1.285539000 | 1.211893000  |

|   |              |              |              |
|---|--------------|--------------|--------------|
| C | 1.511383000  | -0.493089000 | 1.509500000  |
| H | 1.735228000  | -1.287501000 | 2.228391000  |
| H | 1.195401000  | 0.373832000  | 2.093946000  |
| N | -2.476537000 | -0.687734000 | -0.636164000 |
| N | -4.467806000 | -0.604520000 | 0.424352000  |
| N | -2.570491000 | 2.331820000  | -0.750552000 |
| S | -4.400934000 | 3.953409000  | 0.049909000  |
| C | 3.680486000  | -1.057852000 | 0.352015000  |
| C | 3.226322000  | 1.141833000  | 0.581965000  |
| C | 3.651510000  | -2.454079000 | 0.392002000  |
| C | 4.775673000  | -0.357429000 | -0.215944000 |
| C | 2.655478000  | 2.380149000  | 0.885550000  |
| C | 4.485497000  | 1.051833000  | -0.067736000 |
| C | 4.732899000  | -3.142146000 | -0.148617000 |
| H | 2.819288000  | -2.992679000 | 0.828879000  |
| C | 5.846943000  | -1.074415000 | -0.755102000 |
| C | 3.360861000  | 3.526484000  | 0.535402000  |
| H | 1.692800000  | 2.458107000  | 1.375539000  |
| C | 5.170186000  | 2.220309000  | -0.412106000 |
| C | 5.819752000  | -2.463479000 | -0.719796000 |
| H | 4.733126000  | -4.226188000 | -0.127823000 |
| H | 6.691671000  | -0.553669000 | -1.192589000 |
| C | 4.605151000  | 3.452775000  | -0.108423000 |
| H | 2.936385000  | 4.497522000  | 0.764723000  |
| H | 6.133026000  | 2.165593000  | -0.908232000 |

|   |             |              |              |
|---|-------------|--------------|--------------|
| H | 6.645079000 | -3.030357000 | -1.134503000 |
| H | 5.127296000 | 4.365918000  | -0.369228000 |
| N | 2.747860000 | -0.142127000 | 0.825290000  |

### References:

- 1 R. T. Moura, A. N. Carneiro Neto, R. L. Longo and O. L. Malta, *J. Lumin.*, 2016, **170**, 420–430.
